# Supplementary material for: Genetic Polymorphisms and Tumoral Mutational Profiles over Survival in Advanced Colorectal Cancer Patients: An Exploratory Study
Source: MDPI journal article supplement (doi:10.3390/curroncol31010018), 2024-01-03
Supplement: s1 [file s1]

---

## Supplementary material

## Supplementary material

**Table S1.** Variables used in this study.

| Variable                      | Description (groups or units)                                                 |
|-------------------------------|-------------------------------------------------------------------------------|
| Gender                        | The gender of the patients (female or male)                                   |
| Age                           | The age of patients at diagnosis (years)                                      |
| Histology                     | Histological type of colon cancer (adenocarcinoma or mucinous adenocarcinoma) |
| Localization                  | Localization of lesions in the colon (left or right)                          |
| Liver metastases              | Presence or absence of liver metastases                                       |
| Colectomy                     | Presence or absence of colectomy                                              |
| Metastasectomy                | Presence or absence of metastectomy                                           |
| Radiotherapy                  | Presence or absence of radiotherapy to colon cancer                           |
| Monoclonal antibodies therapy | Use of monoclonal antibodies therapy to colon cancer (e.g CUALES?)            |
| Second line of treatment      | Type of second line of treatment: FOLFOX or FOLFIRI                           |
| Overall survival              | Survival from diagnosis until death for any cause                             |

*Note: All patients received FOLFOX or CapeOx as the first-line treatment.*

YO CREO QUE LO QUE PEDÍA EL REVISOR ERA ALGO UN POCO MÁS COMPLETO
